# Supplementary material
Source: PubMed Central journal article supplement (PMC4183666)
Supplement: NIHMS576290-supplement-01.pdf [file NIHMS576290-supplement-01.pdf]

## Supplemental Figure 1

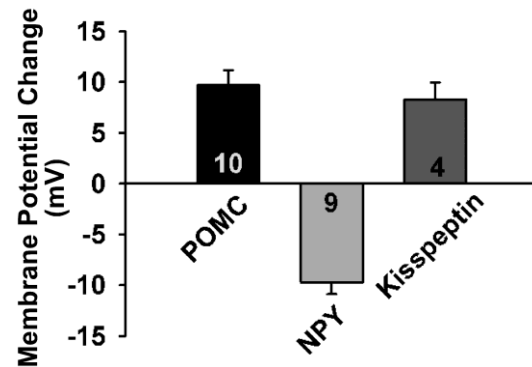

**Figure S1, related to Figure 2. Summary of the effects of GP insulin (20 nM) on membrane potentials of mouse POMC, NPY/AgRP and kisspeptin neurons**

The driving force was essentially equal in all of the cells for testing insulin. Insulin depolarized mouse POMC and kisspeptin neurons ( $9.7 \pm 1.5$  mV,  $n=10$  and  $8.3 \pm 1.7$  mV,  $n=4$ , respectively). In contrast, Insulin hyperpolarized NPY/AgRP neurons ( $-9.7 \pm 1.1$  mV,  $n=9$ ).

## Supplemental Figure 2

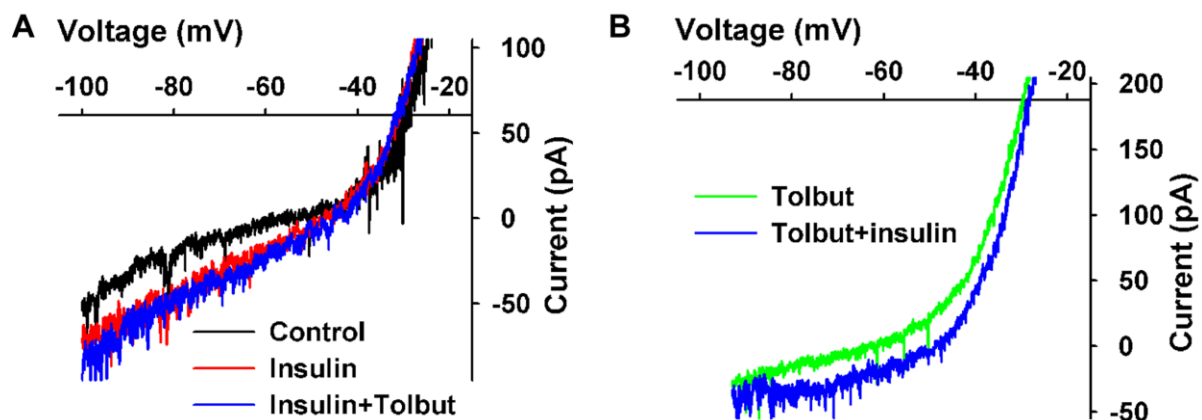

**Figure S2, related to Figure 2. I/V curves generated in POMC-EGFP neurons in the presence of insulin (20 nM) and insulin + tolbutamide (200  $\mu$ M) (A), or in the presence of tolbutamide (200  $\mu$ M, 15 min exposure) and tolbutamide + insulin (B).**

### Supplemental Figure 3

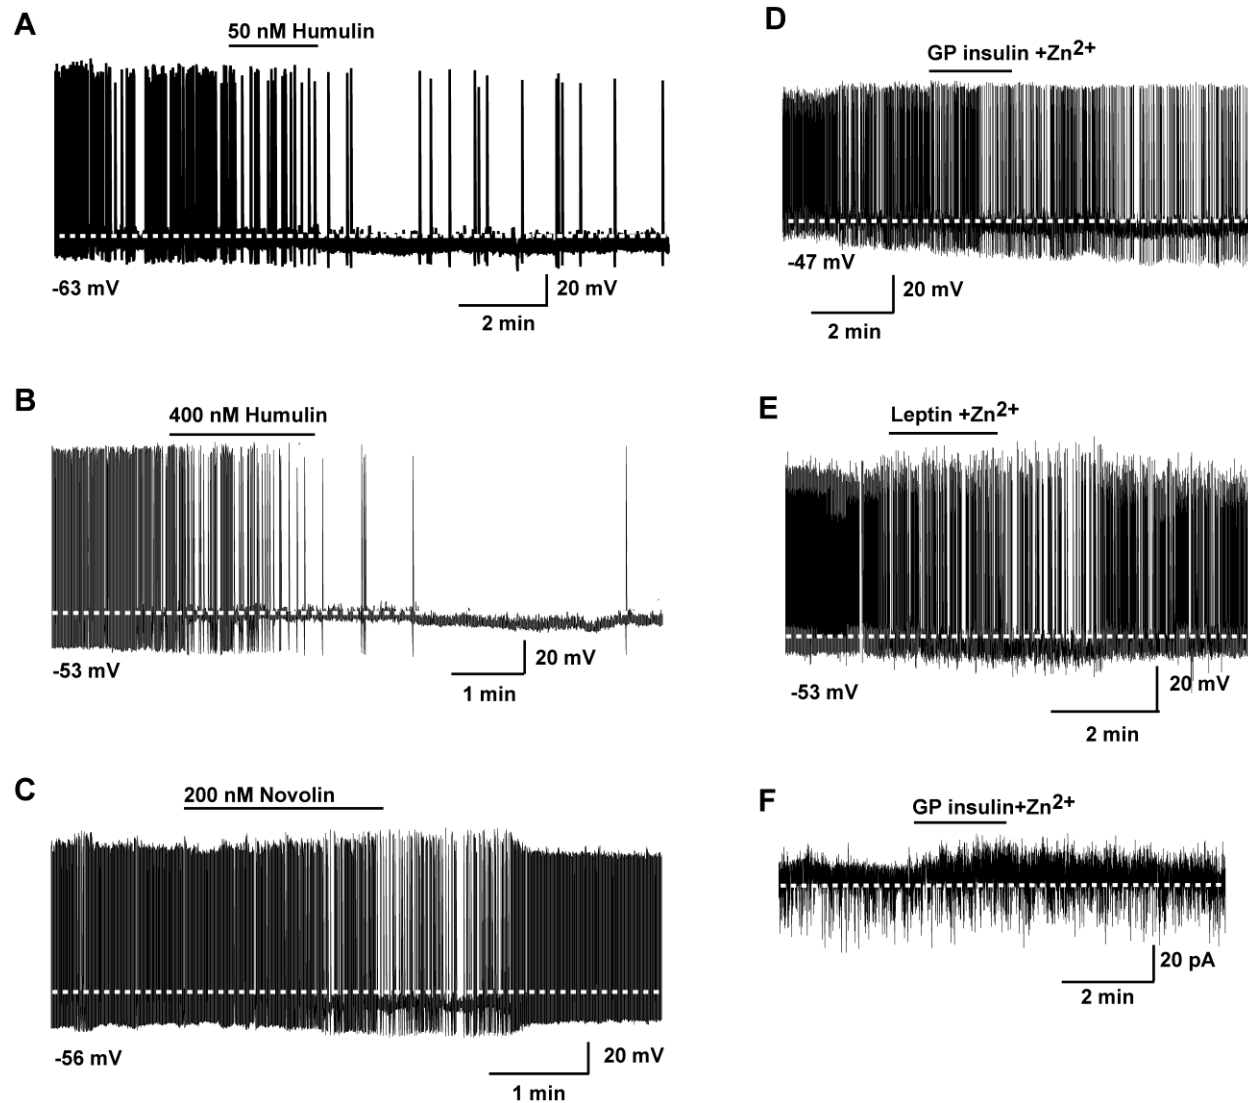

**Figure S3, related to Figure 4. Insulin formulations, as well as purified insulin (or leptin) perfused in combination with Zn<sup>2+</sup>, inhibit POMC neurons**

(A-C) Humulin and Novolin hyperpolarized POMC neurons. (D-E) Guinea pig insulin (150 nM) (or mouse leptin, 100 nM) containing Zn<sup>2+</sup> (75 nM) hyperpolarized POMC neurons. (F) in voltage clamp and in TTX (1  $\mu$ M), guinea pig insulin (150 nM) containing Zn<sup>2+</sup> (75 nM) induced an outward current.  $V_h = -60$  mV. Drugs were bath applied at the concentrations indicated via the superfusion system.

#### Supplemental Figure 4

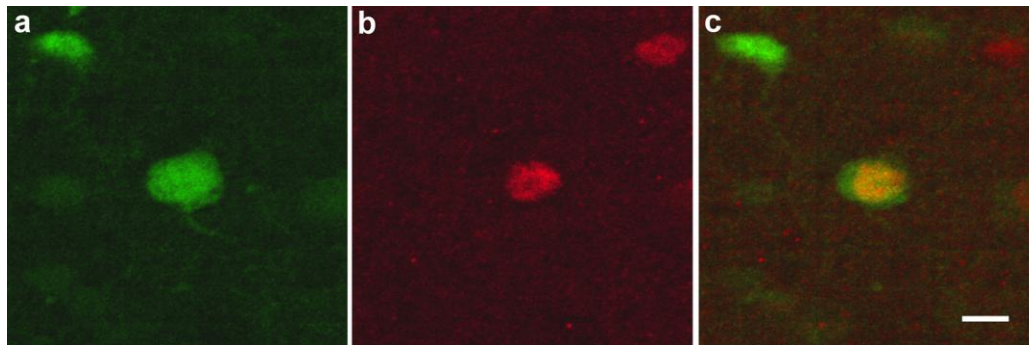

**Figure S4, related to Figure 5. ICV insulin stimulates c-fos expression in POMC-EGFP neurons**

**a**, POMC neurons (green). **b**, c-fos positive nuclei (red). **c**, overlay of **a** and **b** illustrating co-expression (yellow). Scale bar: 10  $\mu$ m.

#### Supplemental Figure 5

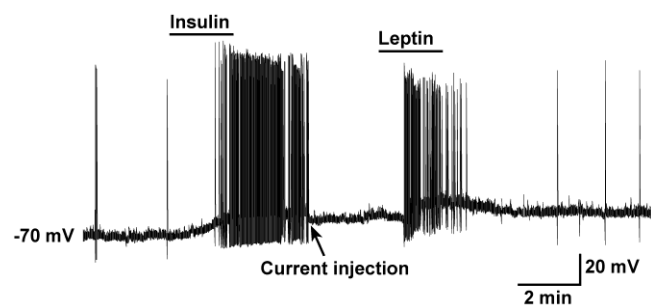

**Figure S5, related to Figure 6. Insulin and leptin depolarized the same population of POMC neurons**

GP-insulin (20 nM), added as a bolus directly to the bath, produced a 13 mV depolarization in this mouse POMC neuron. Then a constant current injection was used to hyperpolarize the cell and silence the firing, and leptin (100 nM) was added. Leptin induced a further depolarization (10 mV) and an increase in firing. Insulin and leptin depolarized the same population of mouse (n=3) and guinea pig (n=3) POMC neurons.
